# Supplementary material for: Molecular dynamics simulation approach of hybrid chalcone–thiazole complex derivatives for DNA gyrase B inhibition: lead generation
Source: Royal Society of Chemistry journal article supplement (doi:10.1039/d3ra00732d), 2023-01-01

### Supplementary Table I - Obtained QSAR models:

**Model 1:**  $\text{pIC}_{50} = -7.7006 + 0.0682 (\text{AATS8i}) + 11.2360 (\text{AVP-1}) + 0.4122 (\text{MoRSEE17}) + 0.4250 (\text{GATSe7})$

|                                     |                                   |                                   |                                    |                                      |                                     |
|-------------------------------------|-----------------------------------|-----------------------------------|------------------------------------|--------------------------------------|-------------------------------------|
| $n_{\text{tr}} = 38$                | $n_{\text{pred}} = 09$            | $R^2 = 0.6898$                    | $R^2_{\text{adj}} = 0.6510$        | $R^2 - R^2_{\text{adj}} = 0.0388$    | $\text{LOF} = 0.2304$               |
| $\text{RMSE}_{\text{tr}} = 0.2304$  | $\text{MAE}_{\text{tr}} = 0.1978$ | $\text{RSS}_{\text{tr}} = 1.9642$ | $\text{CCC}_{\text{tr}} = 0.8164$  | $s = 0.2478$                         | $F = 17.7909$                       |
| $Q^2_{\text{LOO}} = 0.5779$         | $Q^2_{\text{LMO}} = 0.5434$       | $R^2_{\text{Yscr}} = 0.1104$      | $Q^2_{\text{Yscr}} = -0.1947$      | $\text{RMSE}_{\text{cv}} = 0.2689$   | $\text{MAE}_{\text{cv}} = 0.2303$   |
| $\text{PRESS}_{\text{cv}} = 2.6788$ | $\text{CCC}_{\text{cv}} = 0.7553$ | $R^2_{\text{ext}} = 0.7895$       | $\text{MAE}_{\text{ext}} = 0.2112$ | $\text{PRESS}_{\text{ext}} = 0.1830$ | $\text{RMSE}_{\text{ext}} = 0.4013$ |
| $\text{CCC}_{\text{ext}} = 0.8017$  | $Q^2_{\text{F1}} = 0.7350$        | $Q^2_{\text{F2}} = 0.7214$        | $Q^2_{\text{F3}} = 0.7394$         |                                      |                                     |

**Model 2:**  $\text{pIC}_{50} = -8.2543 + 0.0718 (\text{AATS8i}) + 12.11910 (\text{AVP-1}) + 0.4828 (\text{MoRSEE17}) + 0.3563 (\text{GATSe7})$

|                                     |                                   |                                   |                                    |                                      |                                     |
|-------------------------------------|-----------------------------------|-----------------------------------|------------------------------------|--------------------------------------|-------------------------------------|
| $n_{\text{tr}} = 37$                | $n_{\text{pred}} = 09$            | $R^2 = 0.6932$                    | $R^2_{\text{adj}} = 0.6560$        | $R^2 - R^2_{\text{adj}} = 0.0372$    | $\text{LOF} = 0.2311$               |
| $\text{RMSE}_{\text{tr}} = 0.2311$  | $\text{MAE}_{\text{tr}} = 0.1962$ | $\text{RSS}_{\text{tr}} = 2.0301$ | $\text{CCC}_{\text{tr}} = 0.8188$  | $s = 0.2480$                         | $F = 18.6405$                       |
| $Q^2_{\text{LOO}} = 0.5894$         | $Q^2_{\text{LMO}} = 0.5613$       | $R^2_{\text{Yscr}} = 0.1097$      | $Q^2_{\text{Yscr}} = -0.1851$      | $\text{RMSE}_{\text{cv}} = 0.2674$   | $\text{MAE}_{\text{cv}} = 0.2270$   |
| $\text{PRESS}_{\text{cv}} = 2.7168$ | $\text{CCC}_{\text{cv}} = 0.7614$ | $R^2_{\text{ext}} = 0.7895$       | $\text{MAE}_{\text{ext}} = 0.2131$ | $\text{PRESS}_{\text{ext}} = 0.1779$ | $\text{RMSE}_{\text{ext}} = 0.4089$ |
| $\text{CCC}_{\text{ext}} = 0.8017$  | $Q^2_{\text{F1}} = 0.7350$        | $Q^2_{\text{F2}} = 0.7214$        | $Q^2_{\text{F3}} = 0.7394$         |                                      |                                     |

**Supplementary Table II SWISS ADME:**

| <b>Molecule</b> | <b>Molecular weight (Daltons)</b> | <b>Heavy atoms</b> | <b>Aromatic Heavy atoms</b> | <b>Rotatable bonds</b> | <b>H-bond acceptors</b> | <b>H-bond donors</b> | <b>Molecular Refractivity</b> |
|-----------------|-----------------------------------|--------------------|-----------------------------|------------------------|-------------------------|----------------------|-------------------------------|
| 23              | 286.39                            | 20                 | 11                          | 4                      | 2                       | 1                    | 86.12                         |
| 63              | 300.42                            | 21                 | 11                          | 5                      | 2                       | 1                    | 90.93                         |
| 123             | 345.41                            | 23                 | 16                          | 5                      | 4                       | 1                    | 92.06                         |
| 147             | 373.47                            | 25                 | 16                          | 5                      | 4                       | 1                    | 101.99                        |
| 149             | 371.48                            | 25                 | 16                          | 5                      | 4                       | 2                    | 104.06                        |
| 183             | 349.45                            | 25                 | 17                          | 5                      | 3                       | 1                    | 104.16                        |
| 145             | 461.6                             | 32                 | 22                          | 8                      | 4                       | 1                    | 133.01                        |
| 154             | 493.6                             | 34                 | 22                          | 10                     | 6                       | 1                    | 136.07                        |
| 172             | 349.45                            | 25                 | 17                          | 6                      | 3                       | 1                    | 104                           |
| 178             | 351.42                            | 25                 | 17                          | 5                      | 4                       | 2                    | 101.21                        |
| 186             | 365.45                            | 26                 | 17                          | 5                      | 4                       | 2                    | 106.18                        |
| 194             | 487.57                            | 35                 | 23                          | 10                     | 6                       | 1                    | 138.19                        |

| <b>TPSA</b> | <b>Consensus log P</b> | <b>ESOL Class</b>  | <b>GI absorption</b> | <b>BBB permeant</b> | <b>Pgp substrate</b> | <b>CYP1A2 inhibitor</b> | <b>CYP2C19 inhibitor</b> |
|-------------|------------------------|--------------------|----------------------|---------------------|----------------------|-------------------------|--------------------------|
| 70.23       | 3.74                   | Moderately soluble | High                 | Yes                 | No                   | Yes                     | Yes                      |
| 70.23       | 4.16                   | Moderately soluble | High                 | Yes                 | No                   | Yes                     | Yes                      |
| 111.36      | 4.06                   | Moderately soluble | High                 | No                  | No                   | Yes                     | Yes                      |
| 111.36      | 4.73                   | Moderately soluble | Low                  | No                  | No                   | Yes                     | Yes                      |
| 131.59      | 4.09                   | Moderately soluble | Low                  | No                  | No                   | Yes                     | Yes                      |
| 83.12       | 4.29                   | Moderately soluble | High                 | No                  | No                   | Yes                     | Yes                      |
| 120.59      | 5.6                    | Poorly soluble     | Low                  | No                  | Yes                  | No                      | Yes                      |
| 139.05      | 4.94                   | Poorly soluble     | Low                  | No                  | No                   | No                      | Yes                      |

|        |      |                    |      |    |    |     |     |
|--------|------|--------------------|------|----|----|-----|-----|
| 83.12  | 4.28 | Moderately soluble | High | No | No | Yes | Yes |
| 103.35 | 3.65 | Moderately soluble | High | No | No | Yes | Yes |
| 103.35 | 4.01 | Moderately soluble | High | No | No | Yes | Yes |
| 110.81 | 4.86 | Poorly soluble     | Low  | No | No | No  | Yes |

| <b>CYP2C9 inhibitor</b> | <b>CYP2D6 inhibitor</b> | <b>CYP3A4 inhibitor</b> | <b>Lipinski violations</b> | <b>Bioavailability Score</b> | <b>Synthetic Accessibility</b> |
|-------------------------|-------------------------|-------------------------|----------------------------|------------------------------|--------------------------------|
| Yes                     | No                      | Yes                     | 0                          | 0.55                         | 3.37                           |
| Yes                     | No                      | Yes                     | 0                          | 0.55                         | 3.48                           |
| Yes                     | No                      | Yes                     | 0                          | 0.55                         | 3.31                           |
| Yes                     | No                      | Yes                     | 0                          | 0.55                         | 3.5                            |
| Yes                     | No                      | Yes                     | 0                          | 0.55                         | 3.56                           |
| Yes                     | No                      | Yes                     | 0                          | 0.55                         | 3.53                           |
| Yes                     | No                      | Yes                     | 0                          | 0.55                         | 3.92                           |
| Yes                     | No                      | Yes                     | 0                          | 0.55                         | 4.05                           |
| Yes                     | No                      | Yes                     | 0                          | 0.55                         | 3.5                            |
| Yes                     | No                      | Yes                     | 0                          | 0.55                         | 3.39                           |
| Yes                     | No                      | Yes                     | 0                          | 0.55                         | 3.55                           |
| Yes                     | No                      | Yes                     | 0                          | 0.55                         | 4.09                           |

### Supplementary Table III Prottox II ADME:

| <b>ADMET predicted profile --- Classifications</b> | <b>Value</b>      | <b>Probability</b> | <b>Value</b>      | <b>Probability</b> | <b>Value</b>      | <b>Probability</b> |
|----------------------------------------------------|-------------------|--------------------|-------------------|--------------------|-------------------|--------------------|
| <b>PARAMETER</b>                                   | <b>Compound 1</b> |                    | <b>Compound 2</b> |                    | <b>Compound 3</b> |                    |
| <b>Molecular Weight</b>                            | 286               |                    | 300               |                    | 345               |                    |
| <b>AlogP</b>                                       | 4                 |                    | 4.4               |                    | 4.7               |                    |
| <b>H-Bond Acceptor</b>                             | 4                 |                    | 4                 |                    | 6                 |                    |
| <b>H-Bond Donor</b>                                | 1                 |                    | 1                 |                    | 1                 |                    |
| <b>Rotatable Bonds</b>                             | 4                 |                    | 5                 |                    | 5                 |                    |
| <b>Applicability Domain</b>                        | In domain         |                    | In domain         |                    | In domain         |                    |

|                                        |              |       |              |       |              |       |
|----------------------------------------|--------------|-------|--------------|-------|--------------|-------|
| <b>Human Intestinal Absorption</b>     | +            | 0.961 | +            | 0.961 | +            | 0.958 |
| <b>Caco-2</b>                          | +            | 0.684 | +            | 0.801 | +            | 0.654 |
| <b>Blood Brain Barrier</b>             | +            | 0.973 | +            | 0.979 | +            | 0.974 |
| <b>Human oral bioavailability</b>      | +            | 0.643 | +            | 0.7   | +            | 0.743 |
| <b>Subcellular localzation</b>         | Mitochondria | 0.608 | Mitochondria | 0.658 | Mitochondria | 0.663 |
| <b>OATP2B1 inhibitor</b>               | -            | 1     | -            | 0.859 | -            | 0.713 |
| <b>OATP1B1 inhibitor</b>               | +            | 0.938 | +            | 0.927 | +            | 0.936 |
| <b>OATP1B3 inhibitor</b>               | +            | 0.948 | +            | 0.945 | +            | 0.947 |
| <b>MATE1 inhibitor</b>                 | -            | 0.96  | -            | 0.96  | -            | 1     |
| <b>OCT2 inhibitor</b>                  | -            | 0.85  | -            | 0.775 | -            | 0.925 |
| <b>BSEP inhibitor</b>                  | +            | 0.661 | +            | 0.769 | +            | 0.837 |
| <b>P-glycoprotein inhibitor</b>        | -            | 0.743 | -            | 0.69  | -            | 0.672 |
| <b>P-glycoprotein substrate</b>        | -            | 0.943 | -            | 0.857 | -            | 0.821 |
| <b>CYP3A4 substrate</b>                | -            | 0.573 | -            | 0.565 | +            | 0.528 |
| <b>CYP2C9 substrate</b>                | -            | 0.6   | -            | 0.6   | -            | 0.6   |
| <b>CYP2D6 substrate</b>                | -            | 0.887 | -            | 0.887 | -            | 0.882 |
| <b>CYP3A4 inhibition</b>               | -            | 0.683 | -            | 0.641 | -            | 0.607 |
| <b>CYP2C9 inhibition</b>               | +            | 0.844 | +            | 0.646 | +            | 0.725 |
| <b>CYP2C19 inhibition</b>              | +            | 0.778 | +            | 0.849 | +            | 0.78  |
| <b>CYP2D6 inhibition</b>               | -            | 0.918 | -            | 0.826 | -            | 0.896 |
| <b>CYP1A2 inhibition</b>               | +            | 0.949 | +            | 0.95  | +            | 0.956 |
| <b>CYP inhibitory promiscuity</b>      | +            | 0.905 | +            | 0.911 | +            | 0.931 |
| <b>UGT catalyzed</b>                   | -            | 0     | -            | 0     | -            | 0     |
| <b>Carcinogenicity (binary)</b>        | -            | 0.771 | -            | 0.771 | -            | 0.771 |
| <b>Carcinogenicity (trinary)</b>       | Danger       | 0.438 | Warning      | 0.363 | Non-required | 0.43  |
| <b>Eye corrosion</b>                   | -            | 0.991 | -            | 0.988 | -            | 0.985 |
| <b>Eye irritation</b>                  | -            | 0.894 | -            | 0.936 | -            | 0.967 |
| <b>Ames mutagenesis</b>                | -            | 0.74  | -            | 0.68  | -            | 0.64  |
| <b>Human either-a-go-go inhibition</b> | +            | 0.658 | +            | 0.729 | +            | 0.754 |
| <b>micronuclear</b>                    | +            | 0.82  | +            | 0.8   | +            | 0.91  |
| <b>Hepatotoxicity</b>                  | +            | 0.825 | +            | 0.775 | +            | 0.85  |
| <b>Acute Oral Toxicity (c)</b>         | IV           | 0.772 | III          | 0.677 | III          | 0.534 |
| <b>Estrogen receptor binding</b>       | +            | 0.699 | +            | 0.772 | +            | 0.932 |

|                                         |          |               |          |               |          |               |
|-----------------------------------------|----------|---------------|----------|---------------|----------|---------------|
| Androgen receptor binding               | +        | 0.64          | +        | 0.711         | +        | 0.758         |
| Thyroid receptor binding                | +        | 0.744         | +        | 0.845         | +        | 0.519         |
| Glucocorticoid receptor binding         | -        | 0.53          | +        | 0.629         | +        | 0.902         |
| Aromatase binding                       | +        | 0.759         | +        | 0.803         | +        | 0.851         |
| PPAR gamma                              | +        | 0.618         | +        | 0.681         | +        | 0.7           |
| Honey bee toxicity                      | +        | 0.605         | -        | 0.517         | -        | 0.649         |
| Biodegradation                          | -        | 0.85          | -        | 0.85          | -        | 0.925         |
| crustacea aquatic toxicity              | -        | 0.57          | -        | 0.61          | -        | 0.56          |
| Fish aquatic toxicity                   | +        | 0.818         | +        | 0.852         | +        | 0.963         |
| ADMET predicted profile --- Regressions | Value    | Unit          | Value    | Unit          | Value    | Unit          |
| Water solubility                        | -3.303   | logS          | -3.526   | logS          | -3.616   | logS          |
| Plasma protein binding                  | 0.568    | 100%          | 0.584    | 100%          | 0.78     | 100%          |
| Acute Oral Toxicity                     | 2.524    | kg/mol        | 2.587    | kg/mol        | 2.156    | kg/mol        |
| Tetrahymena pyriformis                  | 0.923    | pIGC50 (ug/L) | 0.999    | pIGC50 (ug/L) | 0.659    | pIGC50 (ug/L) |
| Hepatotoxicity                          | Active   | 0.59          | Inactive | 0.56          | Active   | 0.61          |
| Carcinogenicity                         | Active   | 0.5           | Active   | 0.52          | Inactive | 0.52          |
| Immunotoxicity                          | Inactive | 0.97          | Inactive | 0.54          | Inactive | 0.83          |
| Mutagenicity                            | Inactive | 0.55          | Inactive | 0.59          | Inactive | 0.53          |
| Cytotoxicity                            | Inactive | 0.78          | Inactive | 0.69          | Inactive | 0.68          |

| Value      | Probability | Value      | Probability | Value      | Probability |
|------------|-------------|------------|-------------|------------|-------------|
| Compound 4 |             | Compound 5 |             | Compound 6 |             |
| 373        |             | 371        |             | 349        |             |
| 5.3        |             | 4.9        |             | 5.1        |             |
| 6          |             | 7          |             | 5          |             |
| 1          |             | 2          |             | 1          |             |
| 5          |             | 5          |             | 5          |             |
| In domain  |             | In domain  |             | In domain  |             |
| +          | 0.958       | +          | 0.955       | +          | 0.9627      |
| +          | 0.513       | +          | 0.516       | +          | 0.5993      |
| +          | 0.975       | +          | 0.968       | +          | 0.9729      |
| +          | 0.743       | +          | 0.671       | +          | 0.7         |

|              |       |              |       |              |        |
|--------------|-------|--------------|-------|--------------|--------|
| Mitochondria | 0.671 | Mitochondria | 0.716 | Mitochondria | 0.6851 |
| -            | 0.856 | -            | 0.567 | -            | 0.7081 |
| +            | 0.947 | +            | 0.898 | +            | 0.9504 |
| +            | 0.945 | +            | 0.942 | +            | 0.9467 |
| -            | 1     | -            | 0.92  | -            | 0.96   |
| -            | 0.875 | -            | 0.875 | -            | 0.8    |
| +            | 0.872 | +            | 0.802 | +            | 0.9424 |
| -            | 0.571 | -            | 0.63  | +            | 0.6592 |
| -            | 0.771 | -            | 0.719 | -            | 0.8841 |
| +            | 0.5   | +            | 0.564 | -            | 0.5    |
| -            | 0.6   | -            | 0.6   | -            | 0.789  |
| -            | 0.882 | -            | 0.881 | -            | 0.8865 |
| -            | 0.537 | +            | 0.729 | -            | 0.6089 |
| +            | 0.68  | +            | 0.747 | +            | 0.7012 |
| +            | 0.759 | +            | 0.666 | +            | 0.8839 |
| -            | 0.899 | -            | 0.867 | -            | 0.8527 |
| +            | 0.925 | +            | 0.758 | +            | 0.8787 |
| +            | 0.927 | +            | 0.775 | +            | 0.9256 |
| -            | 0     | +            | 0.8   | -            | 0      |
| -            | 0.771 | -            | 0.757 | -            | 0.7714 |
| Danger       | 0.397 | Non-required | 0.367 | Danger       | 0.5749 |
| -            | 0.987 | -            | 0.991 | -            | 0.9925 |
| -            | 0.945 | -            | 0.937 | -            | 0.9469 |
| -            | 0.6   | -            | 0.62  | -            | 0.73   |
| -            | 0.391 | -            | 0.472 | +            | 0.6736 |
| +            | 0.87  | +            | 0.88  | +            | 0.83   |
| +            | 0.825 | +            | 0.825 | +            | 0.8    |
| III          | 0.595 | III          | 0.704 | III          | 0.7686 |
| +            | 0.92  | +            | 0.925 | +            | 0.9173 |
| +            | 0.77  | +            | 0.762 | +            | 0.7992 |
| +            | 0.828 | +            | 0.701 | +            | 0.7731 |
| +            | 0.693 | +            | 0.779 | +            | 0.6976 |
| +            | 0.833 | +            | 0.841 | +            | 0.8071 |
| +            | 0.76  | +            | 0.705 | +            | 0.7978 |
| -            | 0.541 | +            | 0.638 | -            | 0.5571 |
| -            | 0.925 | -            | 0.9   | -            | 0.9    |

|                 |                  |                 |                  |                 |                  |
|-----------------|------------------|-----------------|------------------|-----------------|------------------|
| -               | 0.61             | -               | 0.61             | -               | 0.56             |
| +               | 0.971            | +               | 0.938            | +               | 0.8723           |
| <b>Value</b>    | <b>Unit</b>      | <b>Value</b>    | <b>Unit</b>      | <b>Value</b>    | <b>Unit</b>      |
| -4.088          | logS             | -3.764          | logS             | -3.905          | logS             |
| 1.026           | 100%             | 0.903           | 100%             | 0.731           | 100%             |
| 2.149           | kg/mol           | 2.192           | kg/mol           | 2.337           | kg/mol           |
| 0.678           | pIGC50<br>(ug/L) | 0.873           | pIGC50<br>(ug/L) | 0.844           | pIGC50<br>(ug/L) |
| <b>Active</b>   | <b>0.69</b>      | <b>Inactive</b> | <b>0.54</b>      | <b>Active</b>   | <b>0.55</b>      |
| <b>Active</b>   | <b>0.5</b>       | <b>Active</b>   | <b>0.52</b>      | <b>Active</b>   | <b>0.53</b>      |
| <b>Active</b>   | <b>0.62</b>      | <b>Active</b>   | <b>0.55</b>      | <b>Active</b>   | <b>0.51</b>      |
| <b>Inactive</b> | <b>0.55</b>      | <b>Inactive</b> | <b>0.57</b>      | <b>Inactive</b> | <b>0.52</b>      |
| <b>Inactive</b> | <b>0.71</b>      | <b>Inactive</b> | <b>0.65</b>      | <b>Inactive</b> | <b>0.79</b>      |

| <b>Value</b>     | <b>Probability</b> | <b>Value</b>     | <b>Probability</b> | <b>Value</b>     | <b>Probability</b> |
|------------------|--------------------|------------------|--------------------|------------------|--------------------|
| Compound 7       |                    | Compound 8       |                    | Compound 9       |                    |
| 462              |                    | 494              |                    | 349              |                    |
| 6.7              |                    | 6.1              |                    | 5.1              |                    |
| 7                |                    | 9                |                    | 5                |                    |
| 1                |                    | 1                |                    | 1                |                    |
| 8                |                    | 10               |                    | 6                |                    |
| <b>In domain</b> |                    | <b>In domain</b> |                    | <b>In domain</b> |                    |
| <b>+</b>         | <b>0.9638</b>      | <b>+</b>         | <b>0.9638</b>      | <b>+</b>         | <b>0.9625</b>      |
| <b>-</b>         | <b>0.6605</b>      | <b>-</b>         | <b>0.6645</b>      | <b>+</b>         | <b>0.6411</b>      |
| <b>+</b>         | <b>0.9769</b>      | <b>+</b>         | <b>0.9722</b>      | <b>+</b>         | <b>0.9763</b>      |
| <b>-</b>         | <b>0.5</b>         | <b>+</b>         | <b>0.5286</b>      | <b>+</b>         | <b>0.6</b>         |
| Mitochondria     | 0.8206             | Mitochondria     | 0.7442             | Mitochondria     | 0.6699             |
| -                | 0.7148             | -                | 1                  | -                | 0.7114             |
| +                | 0.9257             | +                | 0.9268             | +                | 0.9356             |
| +                | 0.9398             | +                | 0.9399             | +                | 0.9456             |
| -                | 1                  | -                | 1                  | -                | 0.96               |
| -                | 0.65               | -                | 0.825              | -                | 0.8                |
| +                | 0.9768             | +                | 0.9653             | +                | 0.8981             |
| +                | 0.7557             | +                | 0.8572             | -                | 0.482              |
| <b>-</b>         | <b>0.7891</b>      | <b>-</b>         | <b>0.7094</b>      | <b>-</b>         | <b>0.7883</b>      |
| +                | 0.5779             | +                | 0.6109             | +                | 0.5322             |
| -                | 0.6                | -                | 0.6                | -                | 0.5942             |

|                 |                  |               |                  |               |                  |
|-----------------|------------------|---------------|------------------|---------------|------------------|
| -               | 0.8727           | -             | 0.8727           | -             | 0.8724           |
| +               | 0.8006           | +             | 0.8503           | -             | 0.7079           |
| +               | 0.8399           | +             | 0.6975           | +             | 0.6767           |
| +               | 0.9292           | +             | 0.8775           | +             | 0.8968           |
| -               | 0.7007           | -             | 0.8133           | -             | 0.8013           |
| +               | 0.9058           | +             | 0.8064           | +             | 0.9132           |
| +               | 0.9789           | +             | 0.9533           | +             | 0.9475           |
| -               | 0                | -             | 0                | -             | 0                |
| -               | 0.8031           | -             | 0.8031           | -             | 0.8571           |
| Danger          | 0.3617           | Non-required  | 0.3773           | Danger        | 0.4261           |
| -               | 0.9906           | -             | 0.9893           | -             | 0.9921           |
| -               | 0.9509           | -             | 0.9487           | -             | 0.9514           |
| -               | 0.68             | -             | 0.7              | -             | 0.73             |
| +               | 0.8999           | +             | 0.8772           | +             | 0.9645           |
| +               | 0.79             | +             | 0.85             | +             | 0.86             |
| +               | 0.825            | +             | 0.85             | +             | 0.925            |
| III             | 0.7117           | III           | 0.6233           | III           | 0.7156           |
| +               | 0.8869           | +             | 0.8851           | +             | 0.9386           |
| +               | 0.8805           | +             | 0.884            | +             | 0.8396           |
| +               | 0.7752           | +             | 0.75             | +             | 0.7441           |
| +               | 0.7686           | +             | 0.8394           | +             | 0.8069           |
| +               | 0.7135           | +             | 0.5225           | +             | 0.785            |
| +               | 0.8322           | +             | 0.7327           | +             | 0.828            |
| +               | 0.5821           | +             | 0.6226           | -             | 0.6079           |
| -               | 0.925            | -             | 0.85             | -             | 0.975            |
| -               | 0.57             | -             | 0.51             | -             | 0.54             |
| +               | 0.9785           | +             | 0.9719           | +             | 0.8932           |
| <b>Value</b>    | <b>Unit</b>      | <b>Value</b>  | <b>Unit</b>      | <b>Value</b>  | <b>Unit</b>      |
| -4.775          | logS             | -4.281        | logS             | -3.92         | logS             |
| 0.941           | 100%             | 1.004         | 100%             | 0.624         | 100%             |
| 2.799           | kg/mol           | 2.352         | kg/mol           | 2.271         | kg/mol           |
| 1.043           | pIGC50<br>(ug/L) | 1.181         | pIGC50<br>(ug/L) | 1.009         | pIGC50<br>(ug/L) |
| <b>Active</b>   | <b>0.55</b>      | <b>Active</b> | <b>0.58</b>      | <b>Active</b> | <b>0.61</b>      |
| <b>Active</b>   | <b>0.54</b>      | <b>Active</b> | <b>0.52</b>      | <b>Active</b> | <b>0.51</b>      |
| <b>Inactive</b> | <b>0.77</b>      | <b>Active</b> | <b>0.52</b>      | <b>Active</b> | <b>0.79</b>      |



|          |      |          |      |          |      |
|----------|------|----------|------|----------|------|
| Active   | 0.51 | Inactive | 0.56 | Inactive | 0.55 |
| Inactive | 0.66 | Inactive | 0.69 | Inactive | 0.74 |

| Value        | Probability | Value        | Probability | Value        | Probability |
|--------------|-------------|--------------|-------------|--------------|-------------|
| Compound 10  |             | Compound 11  |             | Compound 12  |             |
| 351          |             | 365          |             | 365          |             |
| 4.5          |             | 4.8          |             | 4.8          |             |
| 6            |             | 6            |             | 6            |             |
| 2            |             | 2            |             | 2            |             |
| 5            |             | 5            |             | 5            |             |
| In domain    |             | In domain    |             | In domain    |             |
| +            | 0.9568      | +            | 0.9568      | +            | 0.9568      |
| +            | 0.5916      | +            | 0.5         | +            | 0.5         |
| +            | 0.9715      | +            | 0.9715      | +            | 0.9715      |
| +            | 0.5429      | +            | 0.5857      | +            | 0.5857      |
| Mitochondria | 0.7303      | Mitochondria | 0.7015      | Mitochondria | 0.7015      |
| -            | 0.7063      | -            | 0.5659      | -            | 0.5659      |
| +            | 0.9481      | +            | 0.9038      | +            | 0.9038      |
| +            | 0.9434      | +            | 0.9413      | +            | 0.9413      |
| -            | 0.92        | -            | 0.92        | -            | 0.92        |
| -            | 0.825       | -            | 0.825       | -            | 0.825       |
| +            | 0.8646      | +            | 0.9085      | +            | 0.9085      |
| -            | 0.6164      | -            | 0.4442      | -            | 0.4442      |
| -            | 0.8329      | -            | 0.7841      | -            | 0.7841      |
| +            | 0.5348      | +            | 0.575       | +            | 0.575       |
| -            | 0.7934      | -            | 0.7934      | -            | 0.7934      |
| -            | 0.8808      | -            | 0.8808      | -            | 0.8808      |
| +            | 0.6514      | +            | 0.7574      | +            | 0.7574      |
| +            | 0.7049      | +            | 0.7684      | +            | 0.7684      |
| +            | 0.7853      | +            | 0.8054      | +            | 0.8054      |
| -            | 0.7626      | -            | 0.7897      | -            | 0.7897      |
| +            | 0.6606      | +            | 0.6144      | +            | 0.6144      |
| +            | 0.7544      | +            | 0.7788      | +            | 0.7788      |
| -            | 0.6         | +            | 0.6         | +            | 0.6         |
| -            | 0.7571      | -            | 0.7571      | -            | 0.7571      |
| Danger       | 0.4279      | Danger       | 0.4579      | Danger       | 0.4579      |
| -            | 0.9922      | -            | 0.9919      | -            | 0.9919      |

|                 |                  |                 |                  |                 |                  |
|-----------------|------------------|-----------------|------------------|-----------------|------------------|
| -               | 0.9443           | -               | 0.9534           | -               | 0.9534           |
| -               | 0.65             | -               | 0.62             | -               | 0.62             |
| -               | 0.4425           | -               | 0.585            | -               | 0.585            |
| +               | 0.89             | +               | 0.87             | +               | 0.87             |
| +               | 0.775            | +               | 0.775            | +               | 0.775            |
| III             | 0.6652           | III             | 0.6656           | III             | 0.6656           |
| +               | 0.8973           | +               | 0.9385           | +               | 0.9385           |
| +               | 0.9155           | +               | 0.8307           | +               | 0.8307           |
| +               | 0.7879           | +               | 0.7456           | +               | 0.7456           |
| +               | 0.7828           | +               | 0.8015           | +               | 0.8015           |
| +               | 0.8156           | +               | 0.8049           | +               | 0.8049           |
| +               | 0.8215           | +               | 0.7983           | +               | 0.7983           |
| -               | 0.5307           | +               | 0.5248           | +               | 0.5248           |
| -               | 0.95             | -               | 0.9              | -               | 0.9              |
| -               | 0.64             | +               | 0.51             | +               | 0.51             |
| +               | 0.9071           | +               | 0.9159           | +               | 0.9159           |
| <b>Value</b>    | <b>Unit</b>      | <b>Value</b>    | <b>Unit</b>      | <b>Value</b>    | <b>Unit</b>      |
| -3.963          | logS             | -4.197          | logS             | -4.197          | logS             |
| 0.747           | 100%             | 0.861           | 100%             | 0.861           | 100%             |
| 2.58            | kg/mol           | 2.311           | kg/mol           | 2.311           | kg/mol           |
| 0.789           | plGC50<br>(ug/L) | 0.96            | plGC50<br>(ug/L) | 0.96            | plGC50<br>(ug/L) |
| <b>Active</b>   | <b>0.63</b>      | <b>Inactive</b> | <b>0.59</b>      | <b>Active</b>   | <b>0.57</b>      |
| <b>Active</b>   | <b>0.59</b>      | <b>Active</b>   | <b>0.52</b>      | <b>Inactive</b> | <b>0.5</b>       |
| <b>Active</b>   | <b>0.97</b>      | <b>Active</b>   | <b>0.96</b>      | <b>Inactive</b> | <b>0.78</b>      |
| <b>Inactive</b> | <b>0.54</b>      | <b>Inactive</b> | <b>0.5</b>       | <b>Inactive</b> | <b>0.52</b>      |
| <b>Inactive</b> | <b>0.68</b>      | <b>Inactive</b> | <b>0.73</b>      | <b>Inactive</b> | <b>0.71</b>      |

Supplementary figure 1 model 3 LMO plot

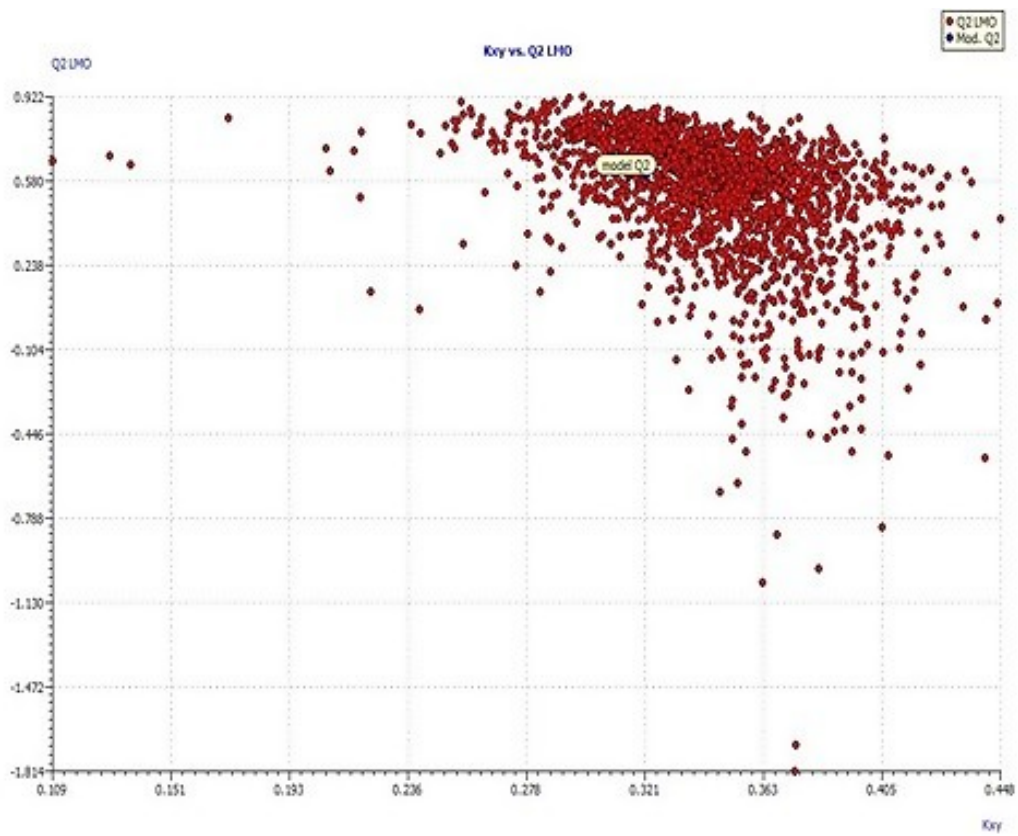

Supplementary figure 2 model 3 Y-scrambles plot

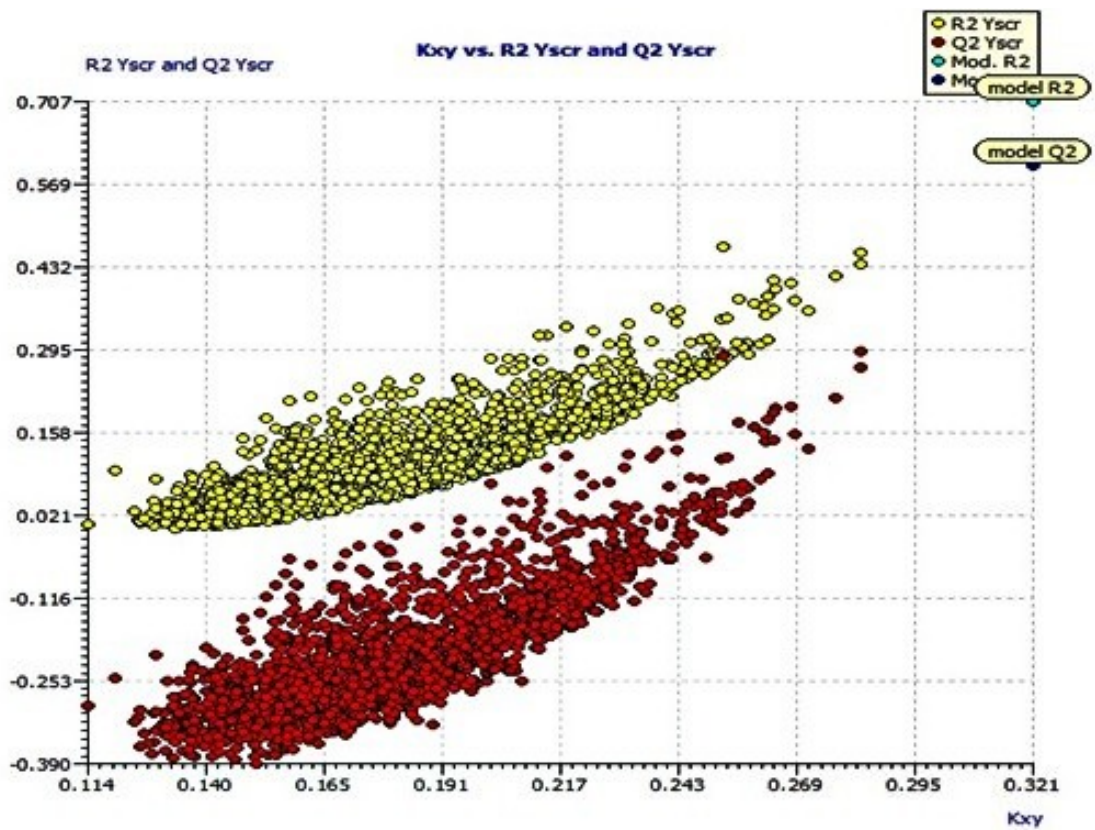

Supplementary figure 3 PCA loading plot model 3 with descriptor names

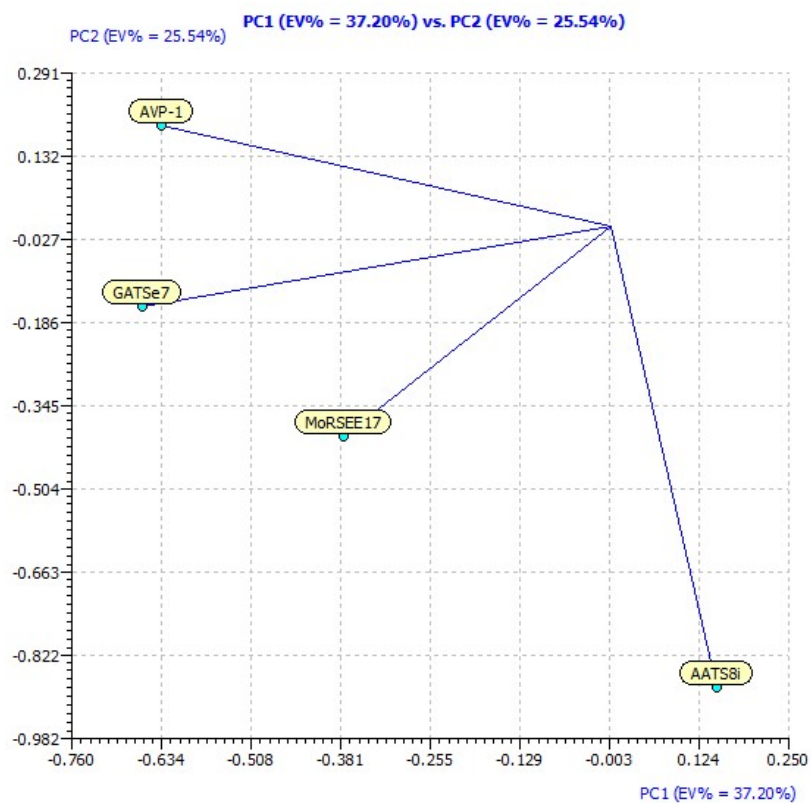

Supplementary figure 4 loading plot for designed and dataset compounds

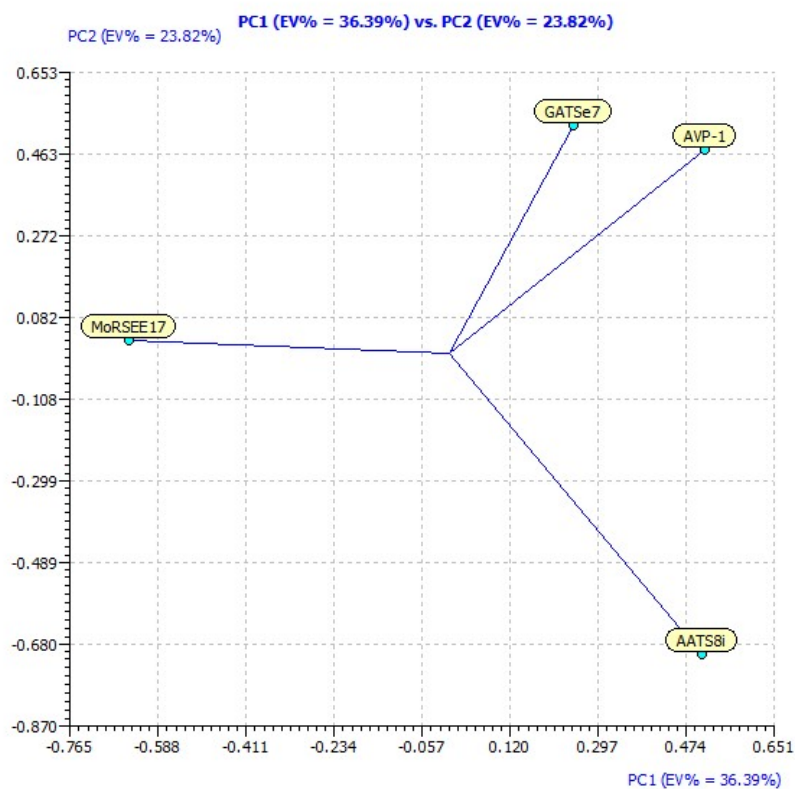

Supplementary figures 5a to 5d docking images combined

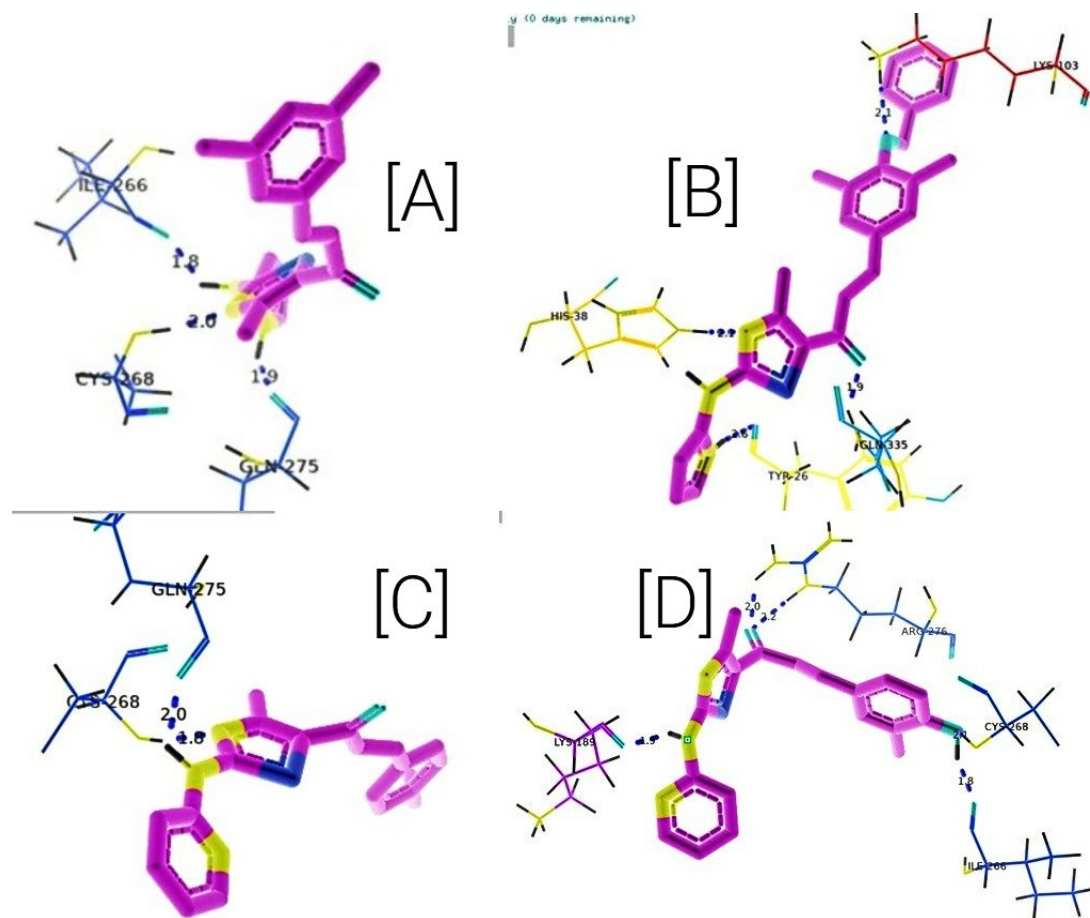

Supplementary Fig 6a RMSD graph of ligand 143 with 6J90

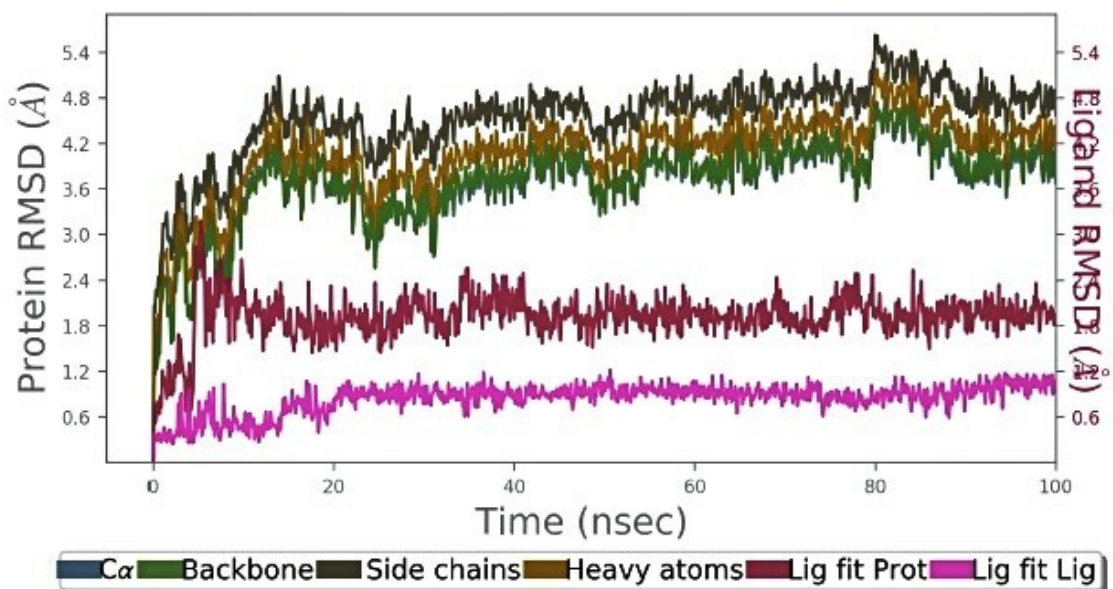



Supplementary Fig 6b RMSF graph ligand 143 with 6J90

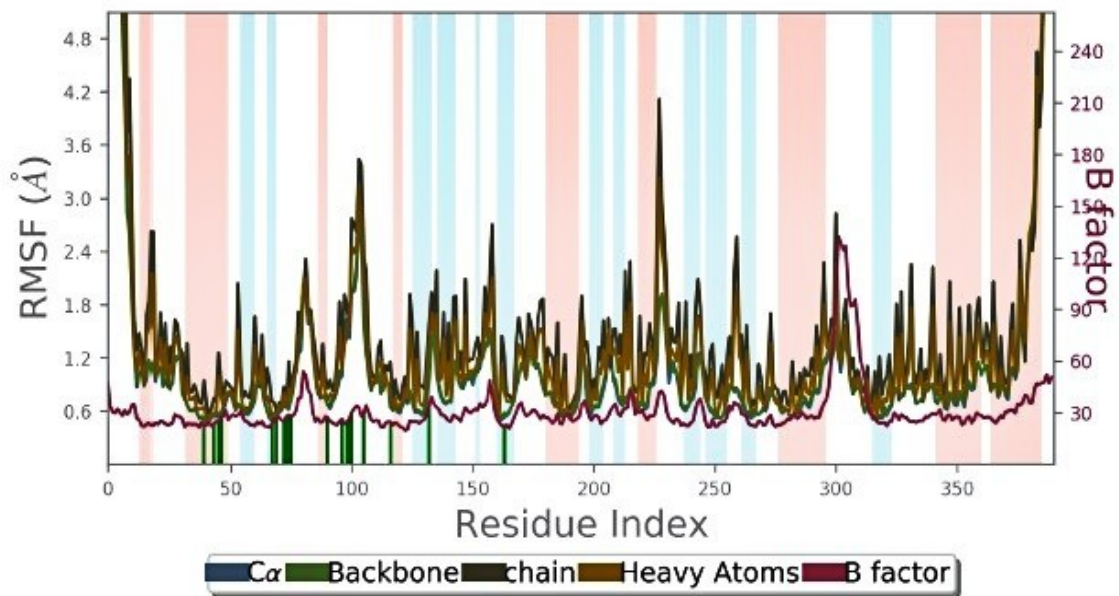

Supplementary Fig 6c Hbond contacts ligand 143 with 6J90

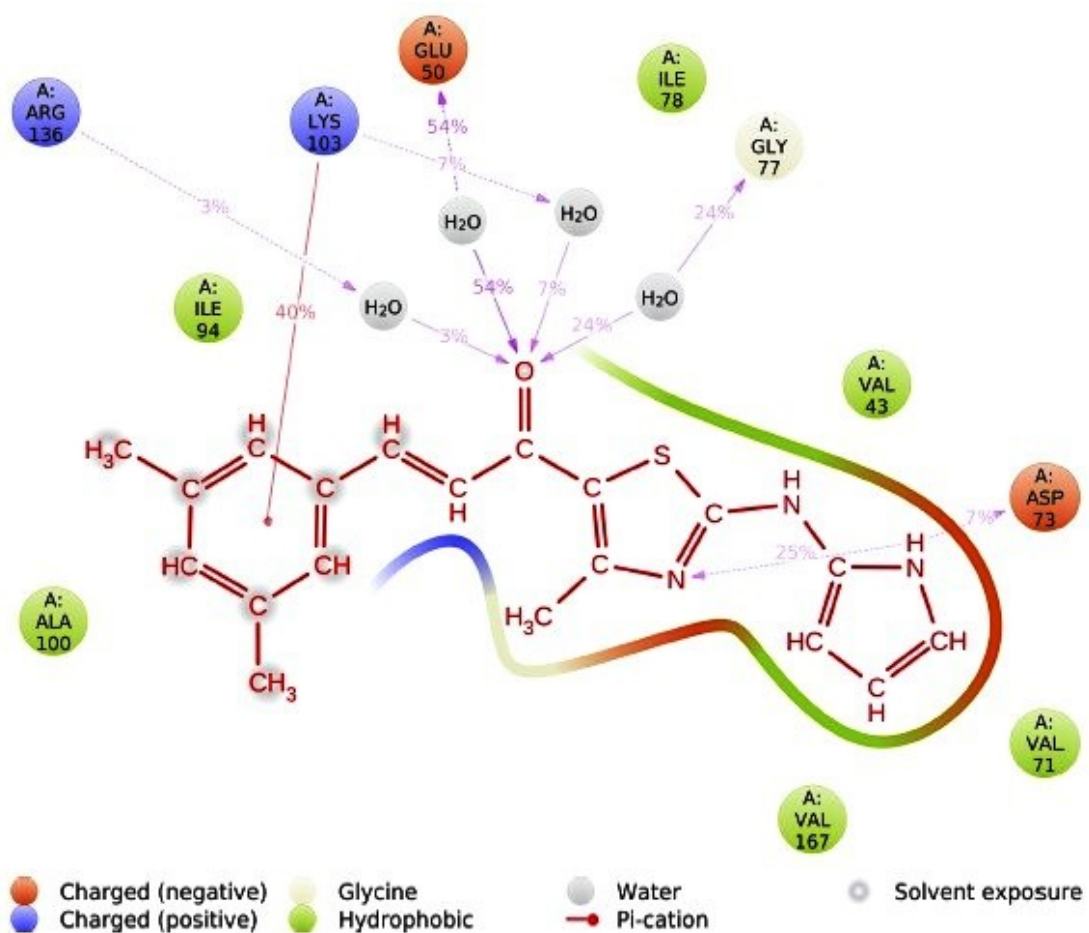

Supplementary Fig 6d Surface analysis ligand 143 with 6J90

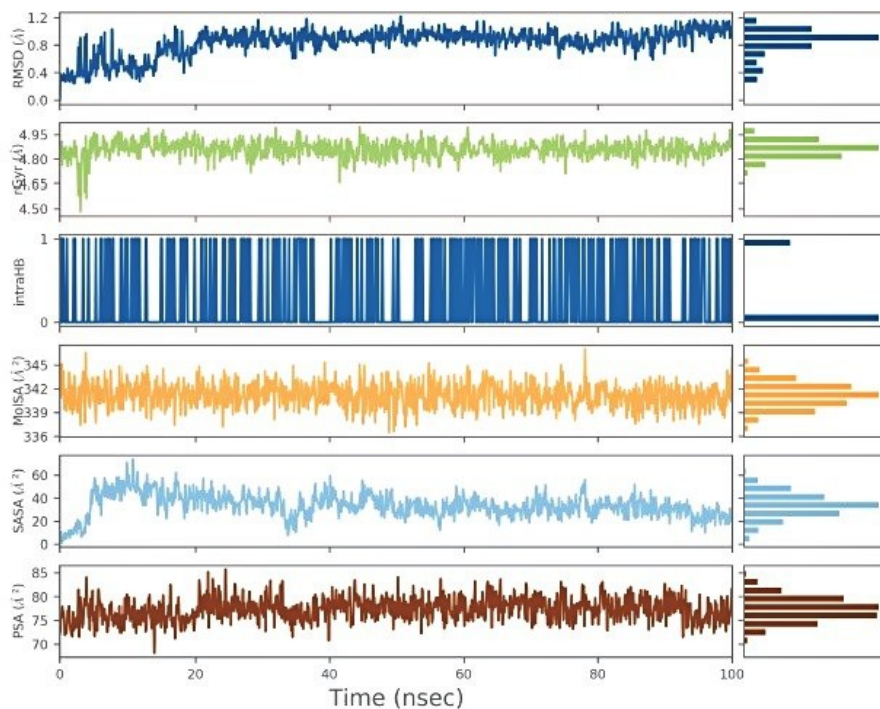

Supplementary Fig 7a RMSD graph of ligand 145 with 6J90

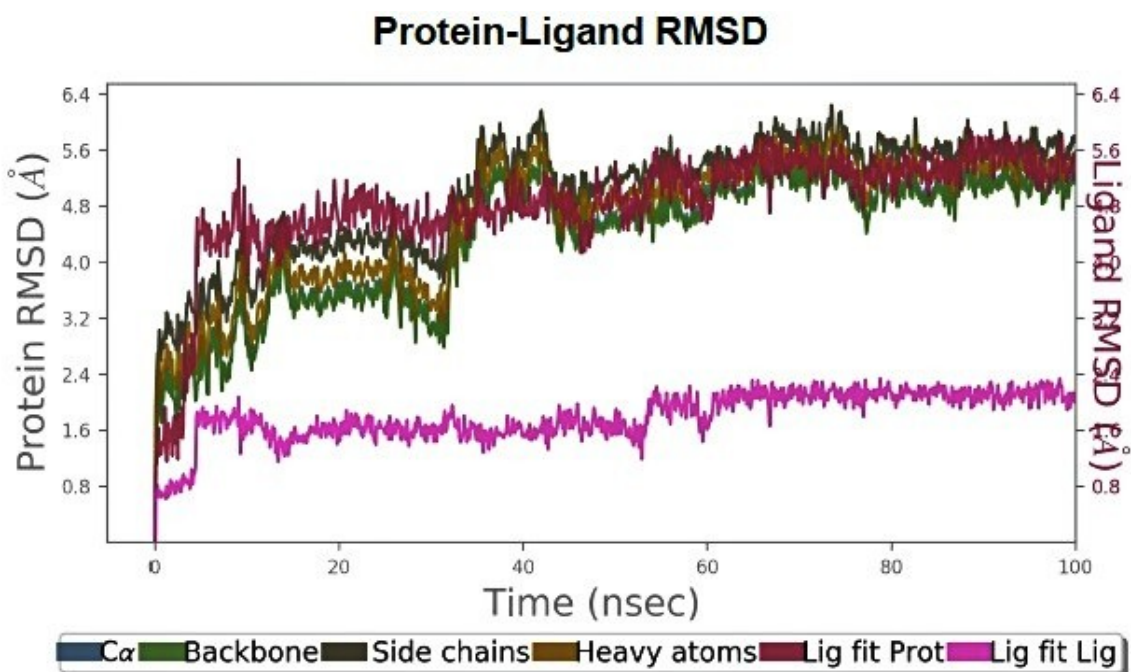

Supplementary Fig 7b RMSF graph ligand 145 with 6J90

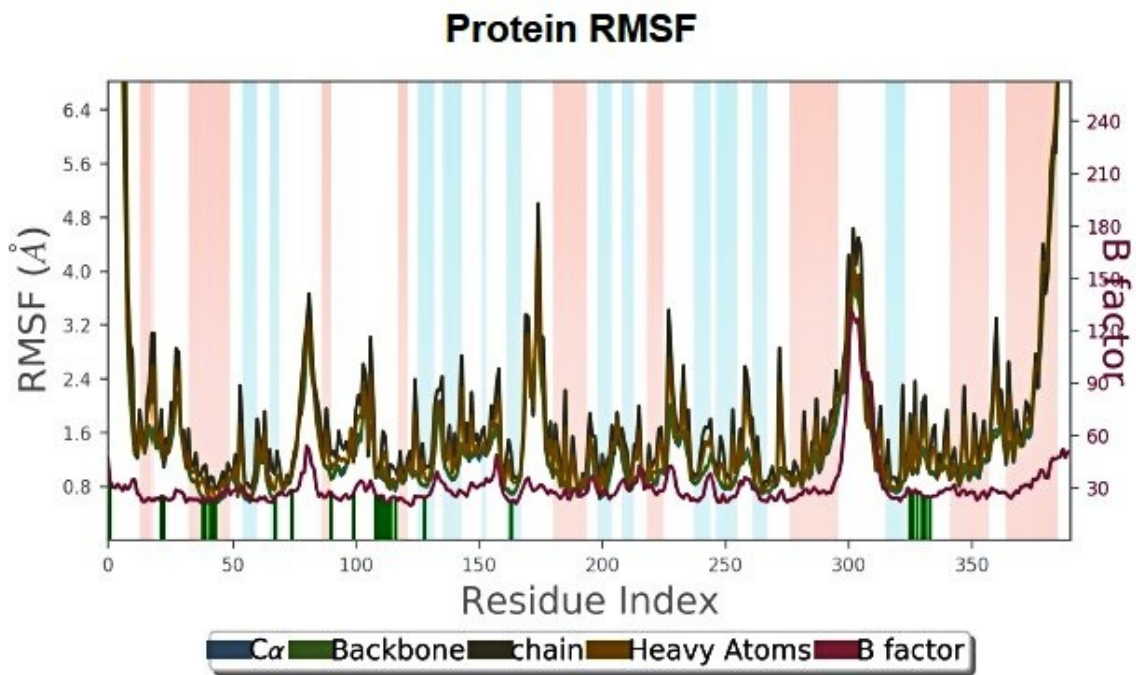

Supplementary Fig 7c Hbond contacts ligand 145 with 6J90

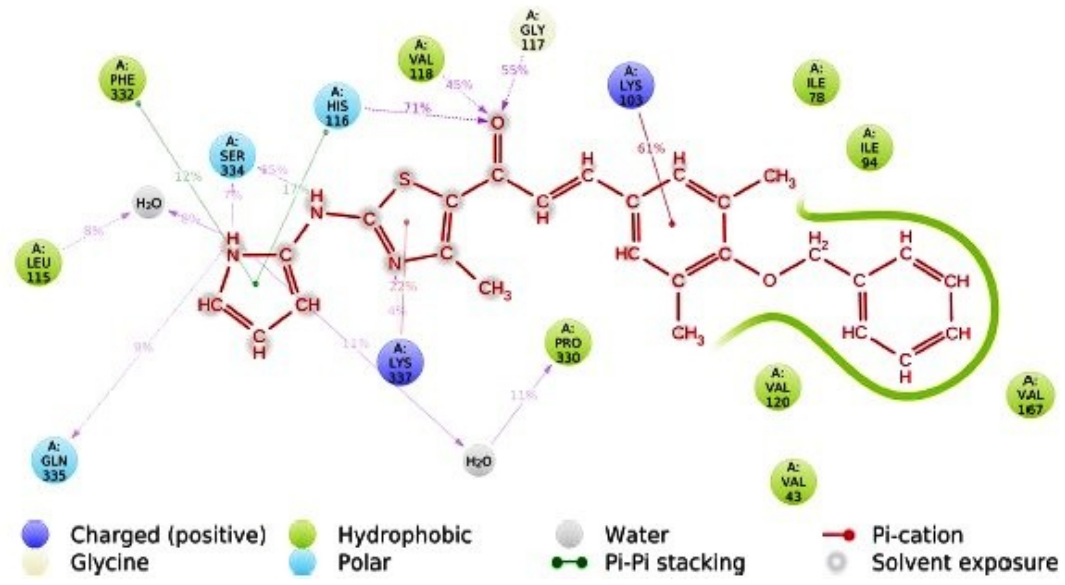



Supplementary Fig 7d Surface analysis ligand 145 with 6J90

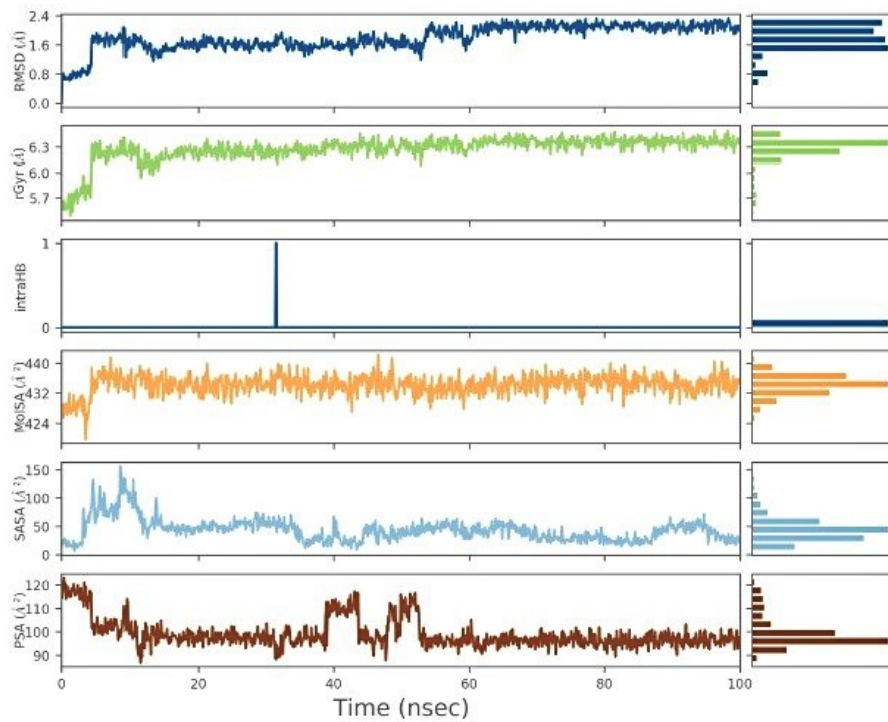

Supplementary Fig 8a RMSD graph of ligand 172 with 6J90

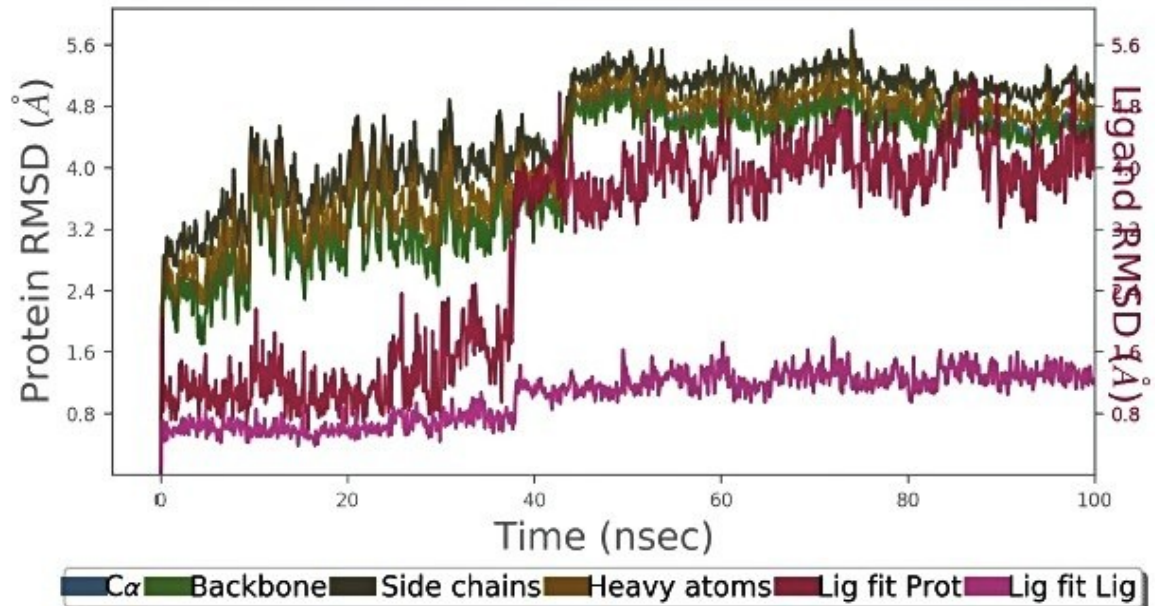

Supplementary Fig 8b RMSF graph ligand 172 with 6J90

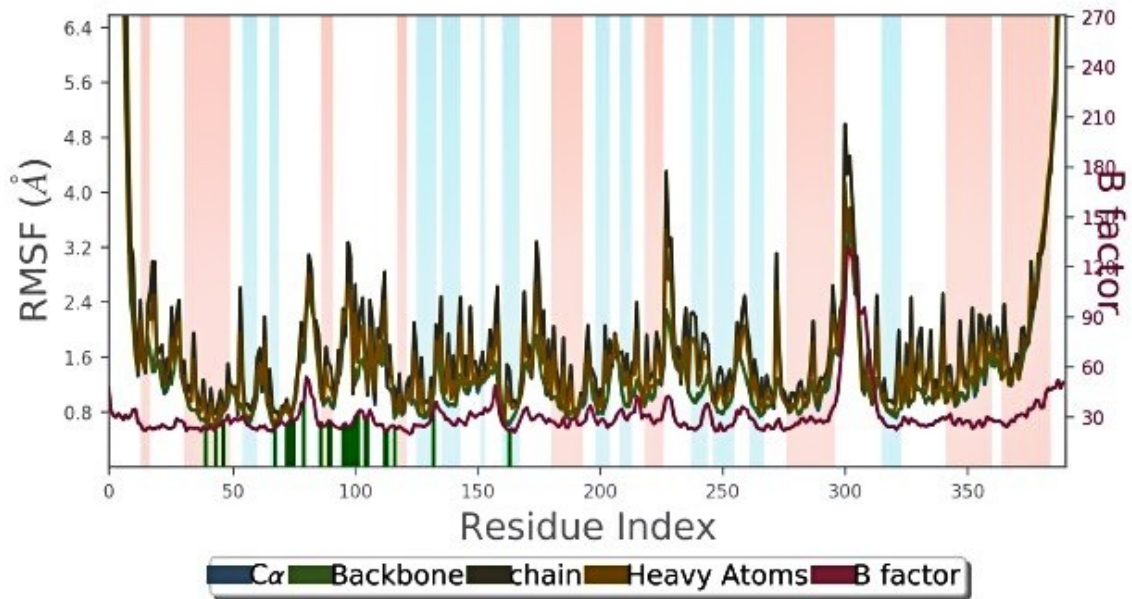

Supplementary Fig 8c Hbond contacts ligand 172 with 6J90

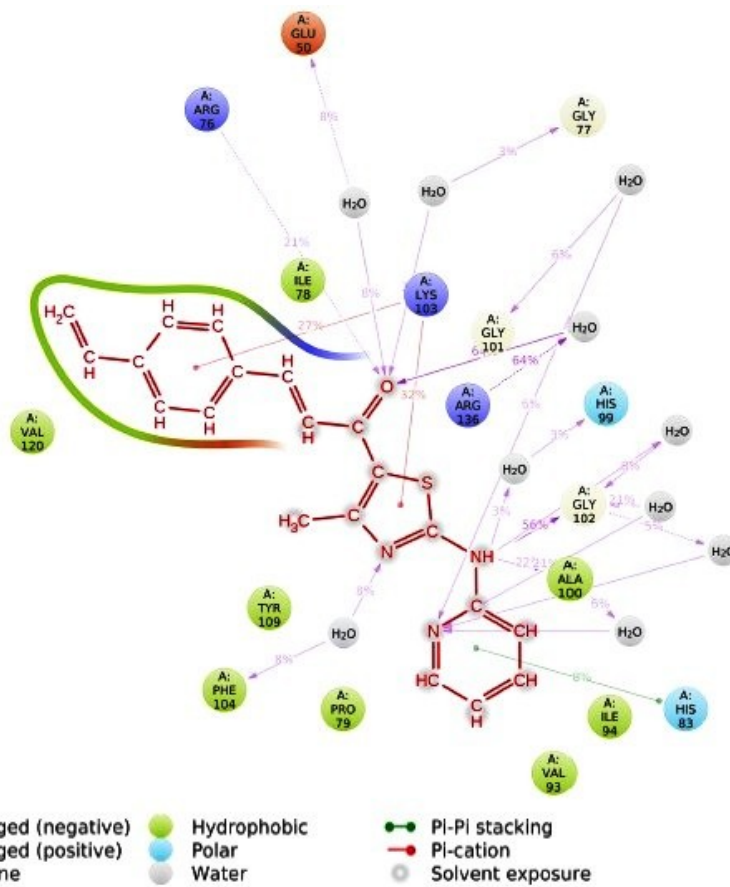

Supplementary Fig 8d Surface analysis ligand 172 with 6J90

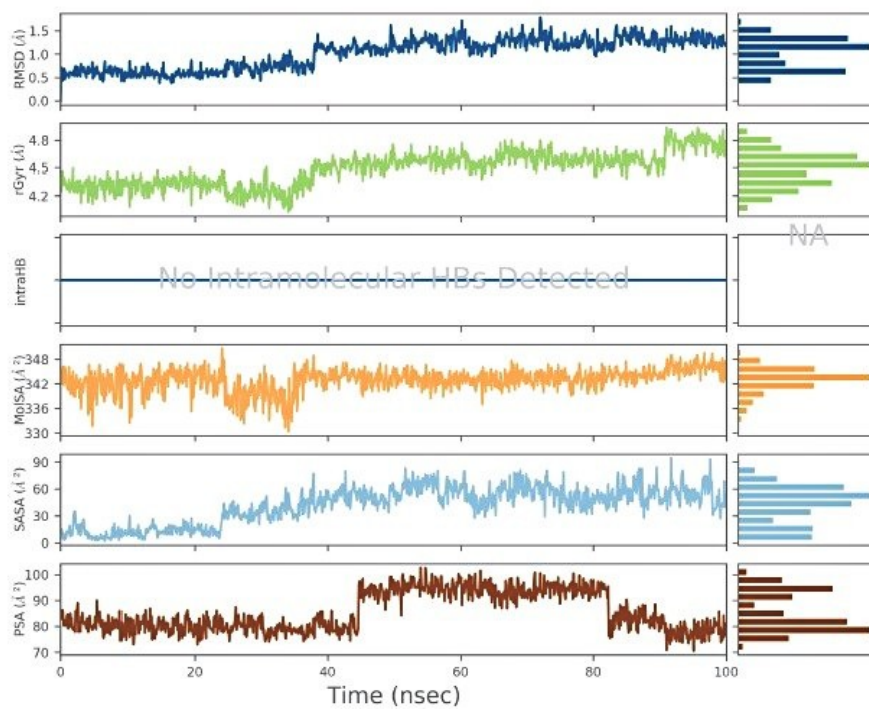

Supplementary Fig 9a RMSD graph of reference compound with 6J90

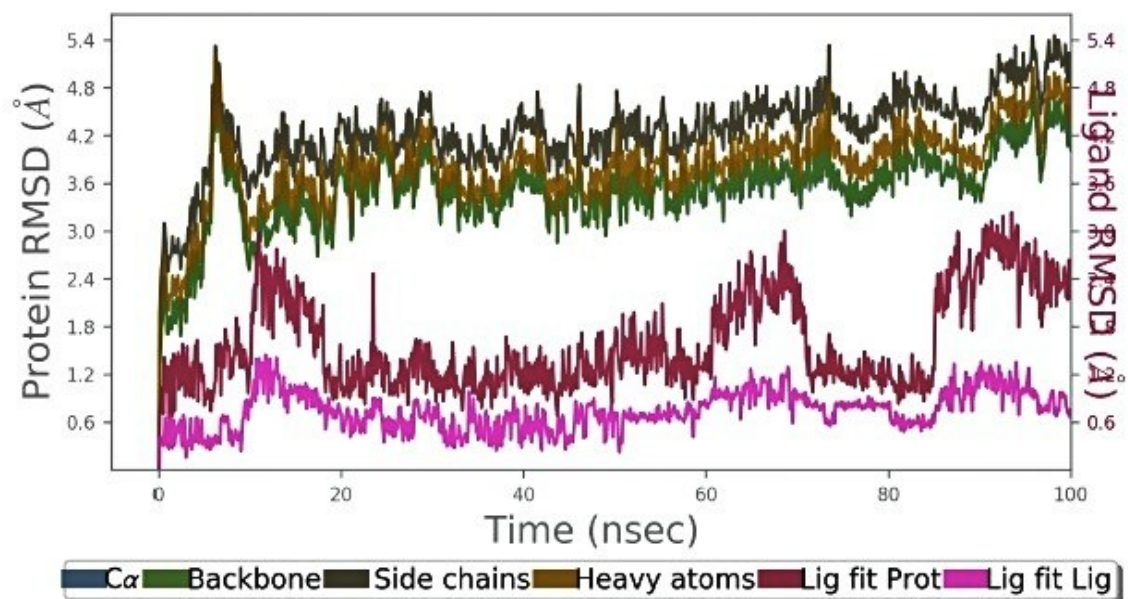

Supplementary Fig 9b RMSF graph reference compound with 6J90

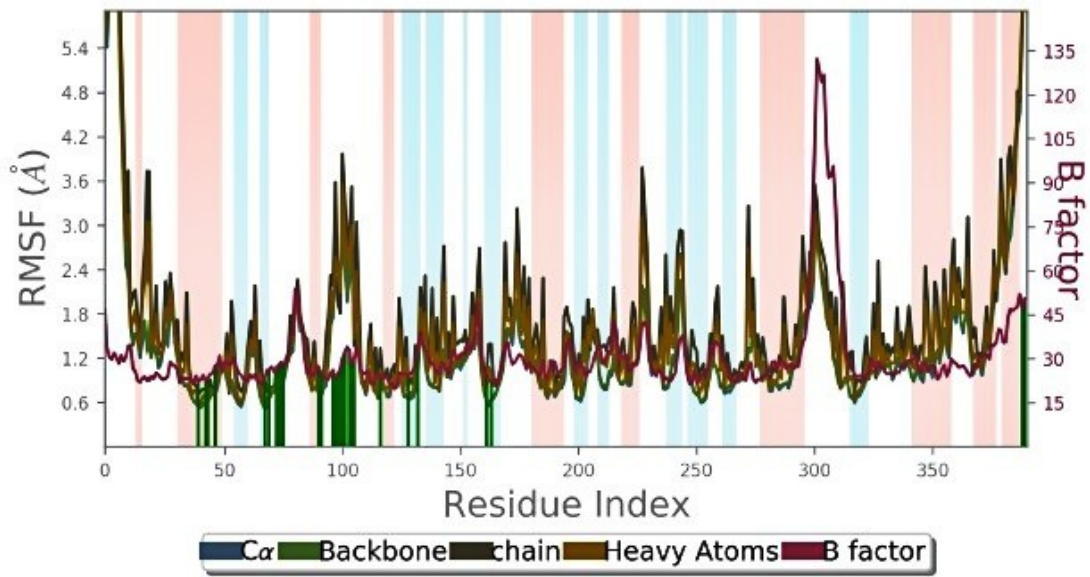

Supplementary Fig 9c Hbond contacts reference compound with 6J90

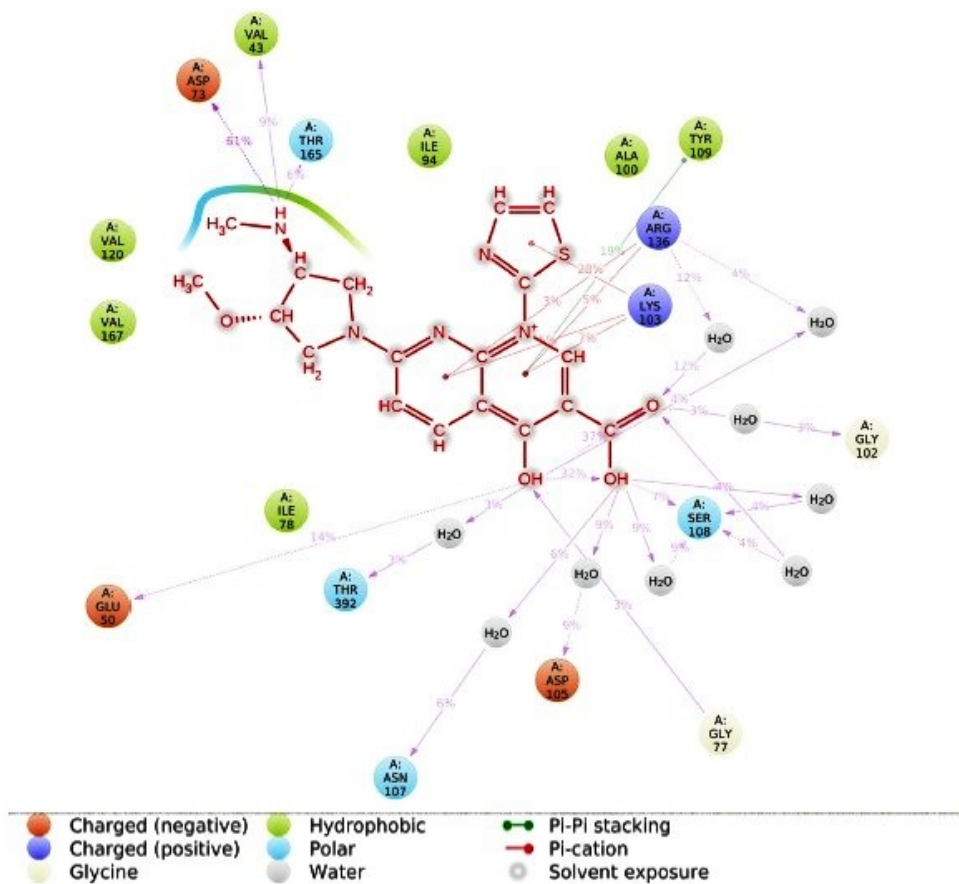



Supplementary Fig 9d Surface analysis of reference compound with 6J90

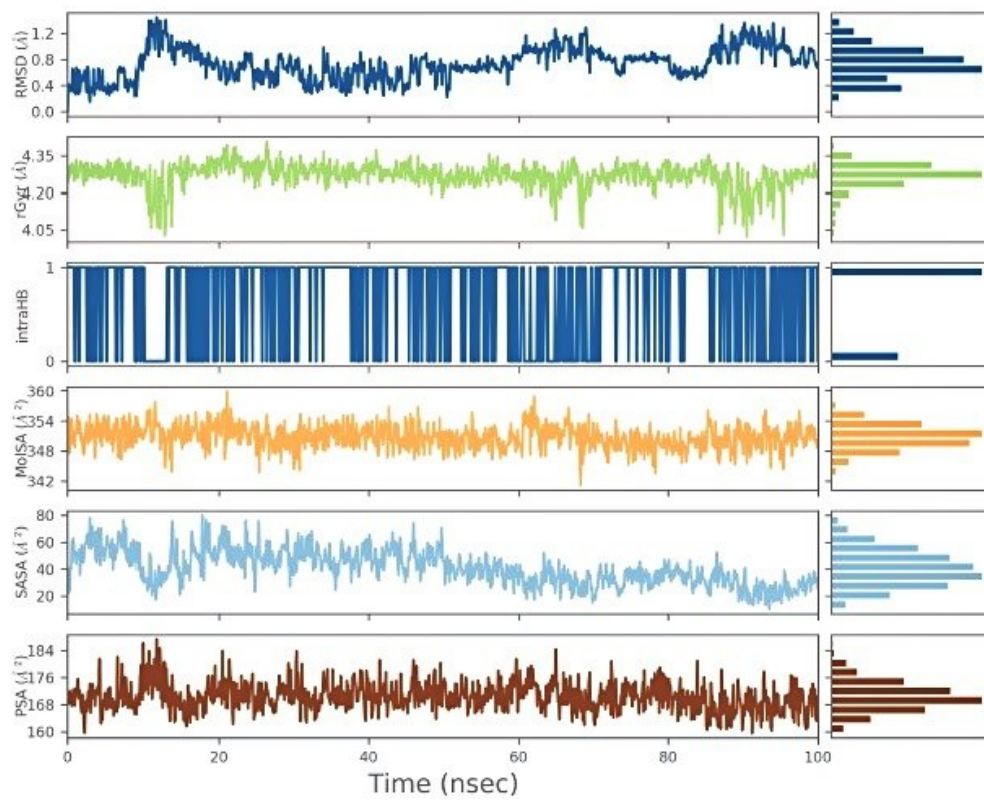

Supplement: d3ra00732d1.pdf [file d3ra00732d1.pdf]
